# Supplementary material
Source: PubMed Central journal article supplement (PMC1636076)

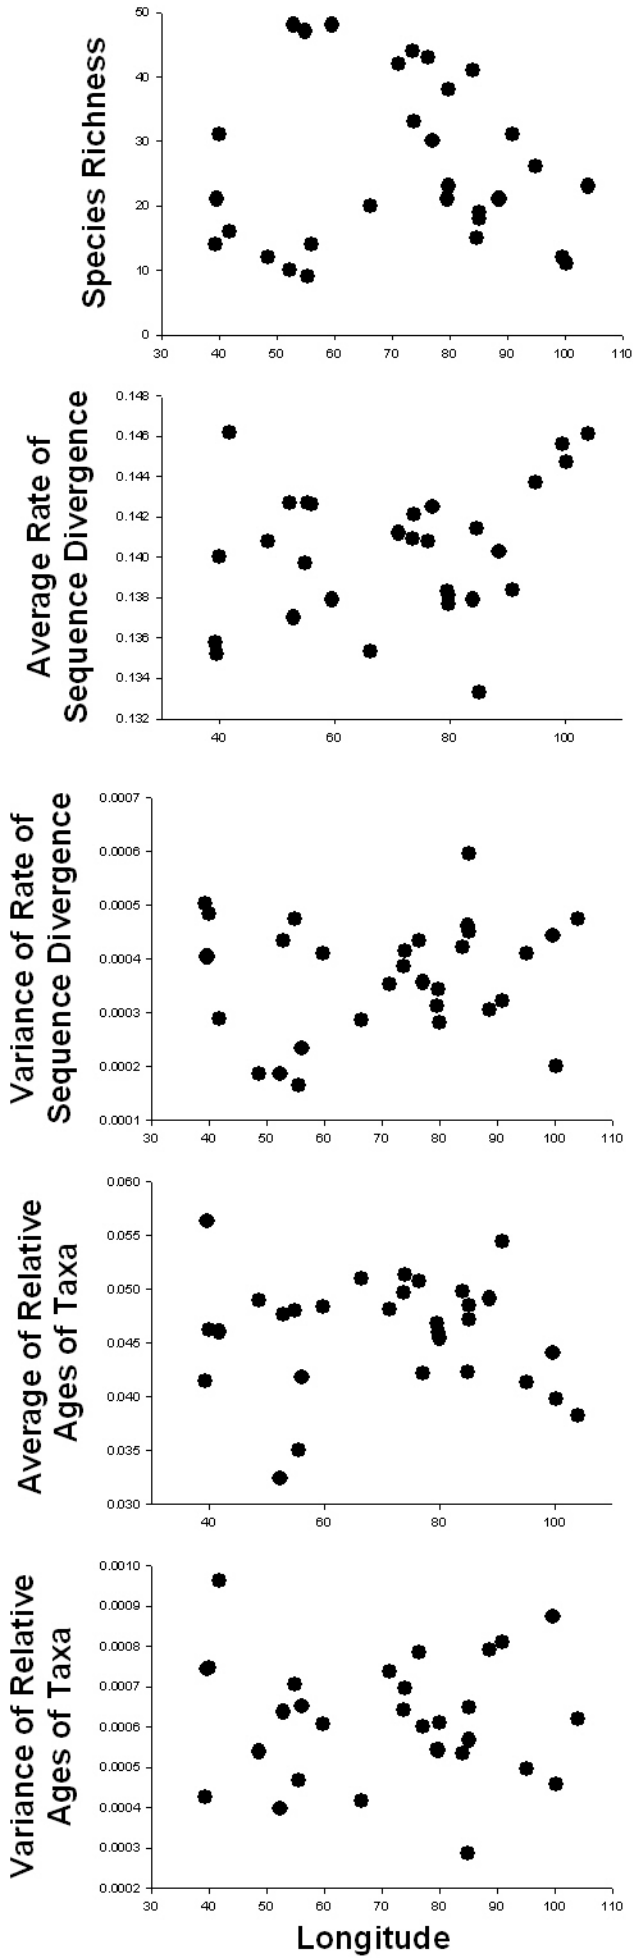

Supplement: rspb20063596s04.pdf [file rspb20063596s04.pdf]
